# Supplementary material for: Synergistic antioxidant and antibacterial effects of a Zn-ascorbate metal–organic framework loaded with marjoram essential oil
Source: Royal Society of Chemistry journal article supplement (doi:10.1039/d4na00519h), 2024-01-01
Supplement: d4na00519h1.pdf [file d4na00519h1.pdf]

## Supplementary Information

### Synergistic antioxidant and antibacterial effect of Zn-ascorbate metal-organic framework loaded with Marjoram essential oil

Rana R. Haikal, Noha El Salakawy, Alaa Ibrahim, Shaimaa L. Ali, and Wael Mamdouh\*

Department of Chemistry, School of Sciences and Engineering, The American University in Cairo (AUC),  
AUC Avenue, P.O. Box 74, New Cairo 11835, Egypt

**Table S1.** Composition of marjoram essential oil (MEO) as purchased (analyzed by GC-MS).

| No. | Compound                             | $t_R$ (min)  | % Peak area  |
|-----|--------------------------------------|--------------|--------------|
| 1   | Thujene                              | 8.11         | 1.27         |
| 2   | $\alpha$ -Pinene                     | 8.31         | 0.88         |
| 3   | Camphene                             | 8.79         | 0.04         |
| 4   | <b>Sabinene</b>                      | <b>9.67</b>  | <b>3.20</b>  |
| 5   | 2- $\beta$ -Pinene                   | 9.75         | 0.43         |
| 6   | $\beta$ -Myrcene                     | 10.32        | 0.89         |
| 7   | <b><math>\alpha</math>-Terpinene</b> | <b>11.19</b> | <b>4.38</b>  |
| 8   | <b><i>o</i>-Cymene</b>               | <b>11.52</b> | <b>15.00</b> |
| 9   | <b>D-Limonene</b>                    | <b>11.63</b> | <b>3.18</b>  |
| 10  | Eucalyptol                           | 11.70        | 0.21         |
| 11  | <b><math>\gamma</math>-Terpinene</b> | <b>12.74</b> | <b>7.82</b>  |
| 12  | <i>m</i> -Cresol                     | 13.58        | 0.12         |
| 13  | $\alpha$ -Terpinolene                | 13.78        | 2.42         |
| 14  | <i>cis</i> -Sabinene hydrate         | 14.13        | 2.28         |
| 15  | Linalool                             | 14.24        | 1.37         |
| 16  | <i>cis-p</i> -Menth-2-en-1-ol        | 14.97        | 0.83         |
| 17  | 1-Terpineol                          | 15.64        | 0.75         |
| 18  | <b>Terpinene-4-ol</b>                | <b>17.14</b> | <b>32.72</b> |
| 19  | <i>p</i> -Cymen-8-ol                 | 17.32        | 0.91         |
| 20  | <b><math>\alpha</math>-Terpineol</b> | <b>17.51</b> | <b>4.49</b>  |
| 21  | Isopulegol                           | 17.65        | 0.48         |
| 22  | <i>trans-p</i> -Menth-1-en-3-ol      | 18.07        | 0.62         |
| 23  | Linalyl anthranilate                 | 19.76        | 2.64         |
| 24  | 1,8-Cineole                          | 21.08        | 0.32         |
| 25  | Carvacrol                            | 21.36        | 0.44         |
| 26  | 4,4-Dimehtylpent-2-enal              | 21.92        | 0.58         |
| 27  | <i>cis</i> -Carveol                  | 23.52        | 0.15         |
| 28  | Caryophyllene                        | 25.12        | 2.54         |
| 29  | (+)-Aromadendrene                    | 25.72        | 0.11         |
| 30  | 1,4-Dihydroxy- <i>p</i> -menth-2-ene | 26.95        | 0.47         |
| 31  | Ledene                               | 27.46        | 0.34         |
| 32  | (+)-Spathulenol                      | 30.03        | 0.67         |

|    |                         |       |              |
|----|-------------------------|-------|--------------|
| 33 | (-)-Caryophyllene oxide | 30.21 | 0.91         |
|    | <b>Total identified</b> |       | <b>93.46</b> |

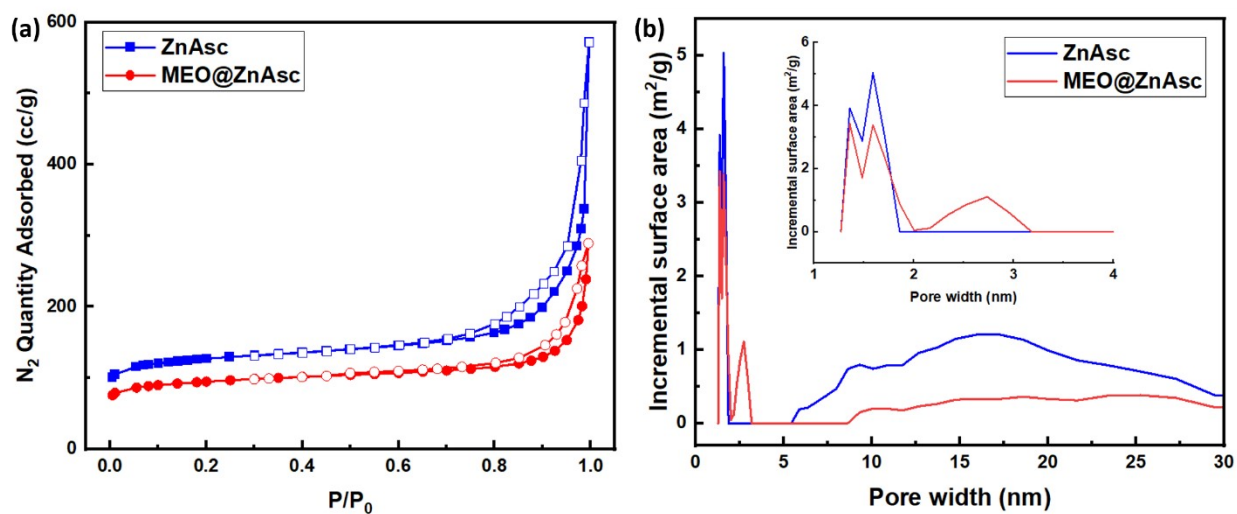

Figure S1. (a)  $N_2$  sorption isotherms and (b) pore size distributions of ZnAsc and MEO@ZnAsc.

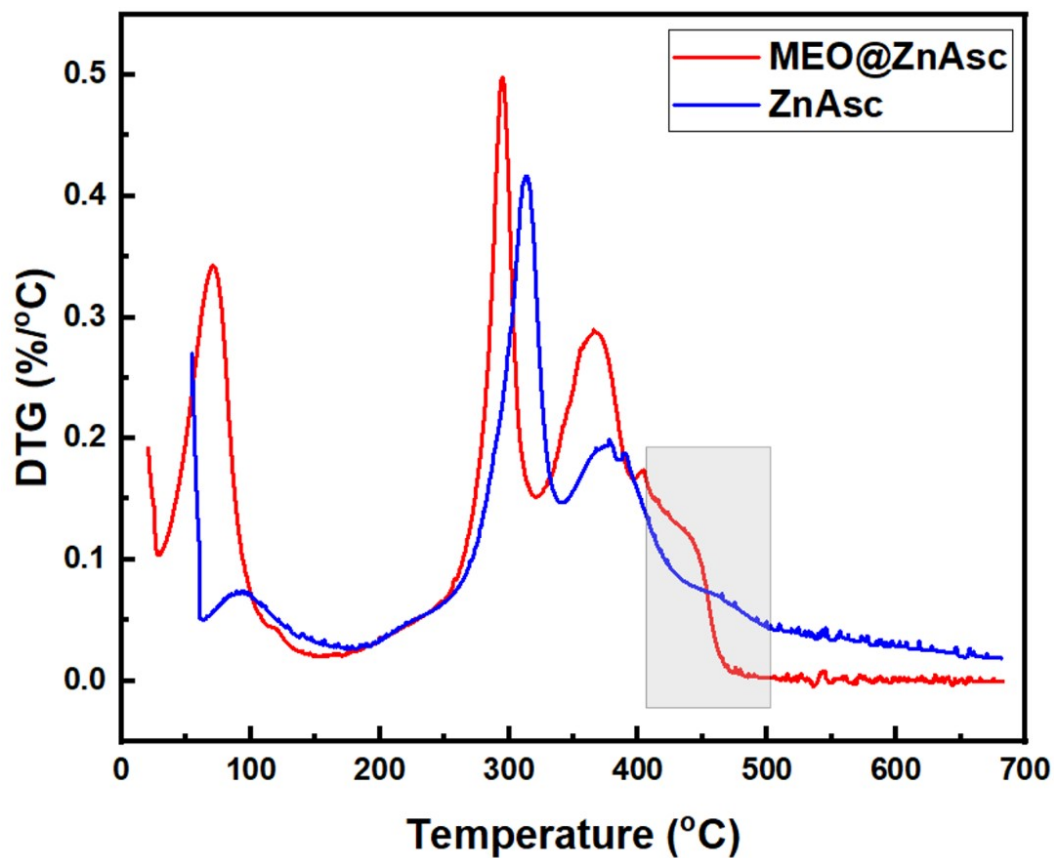

**Figure S2.** First derivative of the TGA profiles of ZnAsc and MEO@ZnAsc.

**Table S2.** Crystallite/particulate size determination by different methods (nm).

| Method | ZnAsc | MEO@ZnAsc |
|--------|-------|-----------|
| SEM    | 20.9  | 23.3      |
| TEM    | 18.6  | 18.1      |
| XRD    | 16.5  | 15.6      |

**Table S3.** Antibacterial activities of Zn-based MOFs.

| MOF                                                                  | Inhibition zone diameter (mm) |                  | Zn wt%    | Ref.             |
|----------------------------------------------------------------------|-------------------------------|------------------|-----------|------------------|
|                                                                      | <i>E. coli</i>                | <i>S. aureus</i> |           |                  |
| Zn-MOF                                                               | -                             | 37.32            | -         | 1                |
| GR-MOF-8                                                             | 15.96                         | 20.20            | 29        | 2                |
| Ac MOF-5                                                             | 10                            | 16               | 34        | 3                |
| Ac Zn-MOF                                                            | 14                            | 16               | 26.4      | 3                |
| Ac TMU-3                                                             | 12                            | 14               | 16.2      | 3                |
| IEF-24                                                               | 5.4                           | -                | 14.1      | 4                |
| Zn-MOF                                                               | 12.22                         | 10.10            | -         | 5                |
| Zn-MOF                                                               | 8.6                           | 17               | 24.6      | 6                |
| [Zn( $\mu$ -4-hzba) <sub>2</sub> ] <sub>2</sub> ·4(H <sub>2</sub> O) | -                             | 14.6             | 13.9      | 7                |
| ZnAsc                                                                | <b>10.33</b>                  | <b>8</b>         | <b>50</b> | <b>This work</b> |

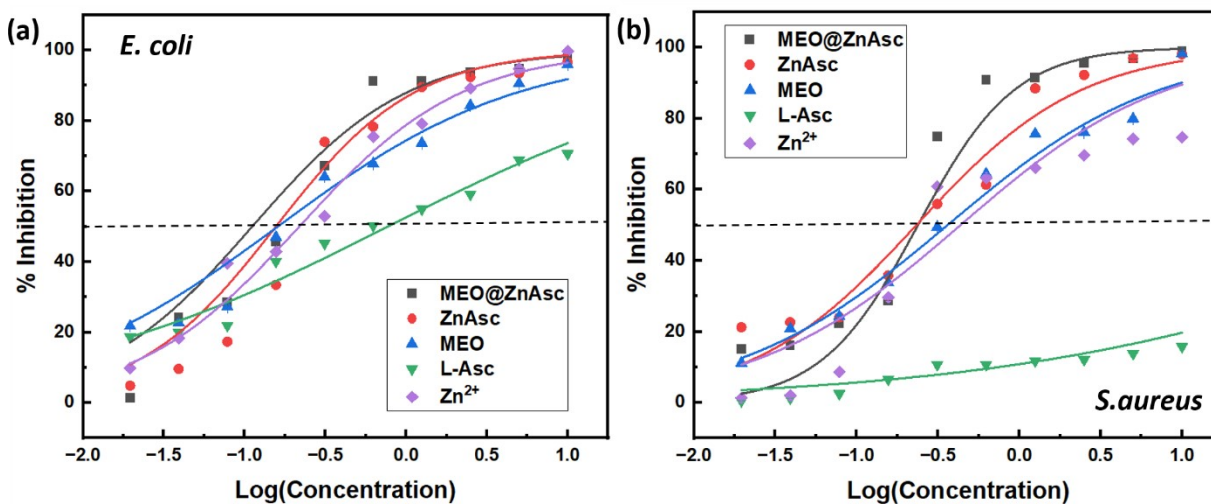

**Figure S3.** Dose response curves of the different samples against *E. coli* (a) and *S. aureus* (b) using broth microdilution method (dots represent experimental data and lines represent sigmoidal data fitting from which IC<sub>50</sub> values were calculated).

**References**

1. X. Xu, M. Ding, K. Liu, F. Lv, Y. Miao, Y. Liu, Y. Gong, Y. Huo and H. Li, *Front Chem*, 2023, **11**.
2. S. Rojas, A. García-García, T. Hidalgo, M. Rosales, D. Ruiz-Camino, P. Salcedo-Abraira, H. Montes-Andrés, D. Choquesillo-Lazarte, R. Rosal, P. Horcajada and A. Rodríguez-Diéguez, *Journal*, 2022, **12**.
3. M. Nakhaei, K. Akhbari, M. Kalati and A. Phuruangrat, *Inorganica Chimica Acta*, 2021, **522**, 120353.
4. S. N. Lelouche, L. Albentosa-González, P. Clemente-Casares, C. Biglione, A. Rodríguez-Diéguez, J. Tolosa Barrilero, J. C. García-Martínez and P. Horcajada, *Journal*, 2023, **13**.
5. C. Yuan, Y. Miao, Y. Chai, X. Zhang, X. Dong and Y. Zhao, *Journal*, 2023, **28**.
6. F. Akbarzadeh, M. Motaghi, N. P. S. Chauhan and G. Sargazi, *Heliyon*, 2020, **6**, e03231.
7. J. Restrepo, Z. Serroukh, J. Santiago-Morales, S. Aguado, P. Gómez-Sal, M. E. G. Mosquera and R. Rosal, *European Journal of Inorganic Chemistry*, 2017, **2017**, 574-580.
